# Supplementary material for: Quantifying Landscape and Social Amenities as Ecosystem Services in Rapidly Changing Peri-Urban Landscape
Source: MDPI journal article supplement (doi:10.3390/land12020477), 2023-02-15
Supplement: s1 [file land-2148524-supplementary.pdf › land-2148524-supplementary.pdf]

## Quantifying Landscape and Social Amenities as Ecosystem Services in Rapidly Changing Peri-Urban Landscape

|    |                                              |                                                      |                                                |                                                  |                                           |                                           |                                      |
|----|----------------------------------------------|------------------------------------------------------|------------------------------------------------|--------------------------------------------------|-------------------------------------------|-------------------------------------------|--------------------------------------|
| 1. | Sex:                                         | Male <input type="checkbox"/>                        | Woman <input type="checkbox"/>                 |                                                  |                                           |                                           |                                      |
| 2. | Age                                          | from 15-30                                           | from 31-45                                     | from 46-60                                       | Over 61                                   |                                           |                                      |
| 3. | Education:                                   | illiterate                                           | Primary                                        | Matric                                           | Inter                                     | Graduate                                  | Master>                              |
| 4. | Status                                       | Unmarried<br>/ unmarried<br><input type="checkbox"/> | In<br>widowhood<br><input type="checkbox"/>    | Married <input type="checkbox"/>                 | No. Children: .....                       |                                           |                                      |
| 5. | Employment:                                  | Students<br><input type="checkbox"/>                 | Public<br>servants<br><input type="checkbox"/> | Private<br>employees<br><input type="checkbox"/> | Household<br><input type="checkbox"/>     | Unemployed<br><input type="checkbox"/>    | Retirees<br><input type="checkbox"/> |
| 6. | Personal<br>or familial. Income:             | up to<br>5,000<br><input type="checkbox"/>           | 5,001–<br>10,000 <input type="checkbox"/>      | 10,001–<br>25,000<br><input type="checkbox"/>    | 25,001–40,000<br><input type="checkbox"/> | more than 40,001 <input type="checkbox"/> |                                      |
| 7. | Are you familiar with using a<br>computer?   | Not at<br>all <input type="checkbox"/>               | A little <input type="checkbox"/>              | Enough<br><input type="checkbox"/>               | Very <input type="checkbox"/>             | Too much <input type="checkbox"/>         |                                      |
| 8. | Do you have a PC?                            | YES <input type="checkbox"/>                         |                                                |                                                  | NO <input type="checkbox"/>               |                                           |                                      |
| 9. | You have access to the internet ( internet ) | YES <input type="checkbox"/>                         |                                                |                                                  | NO <input type="checkbox"/>               |                                           |                                      |

10. Do you consider yourself aware of environmental issues in ?

|                                     |                                   |                                 |                               |                                   |
|-------------------------------------|-----------------------------------|---------------------------------|-------------------------------|-----------------------------------|
| Not at all <input type="checkbox"/> | A little <input type="checkbox"/> | Enough <input type="checkbox"/> | Very <input type="checkbox"/> | Too much <input type="checkbox"/> |
|-------------------------------------|-----------------------------------|---------------------------------|-------------------------------|-----------------------------------|

11. Do you consider yourself aware of global environmental issues (climate change, greenhouse effect, etc. ) :

|                                     |                                   |                                 |                               |                                   |
|-------------------------------------|-----------------------------------|---------------------------------|-------------------------------|-----------------------------------|
| Not at all <input type="checkbox"/> | A little <input type="checkbox"/> | Enough <input type="checkbox"/> | Very <input type="checkbox"/> | Too much <input type="checkbox"/> |
|-------------------------------------|-----------------------------------|---------------------------------|-------------------------------|-----------------------------------|

12. What do you prefer most?

|                                                                                          |                                                             |
|------------------------------------------------------------------------------------------|-------------------------------------------------------------|
| A walk within the city (river, parks, pedestrian street, etc. ) <input type="checkbox"/> | A walk in the suburban green areas <input type="checkbox"/> |
|------------------------------------------------------------------------------------------|-------------------------------------------------------------|

13. How many times have you visited the Parks, Rivers or green areas?

|                               |                                 |                                |                                     |
|-------------------------------|---------------------------------|--------------------------------|-------------------------------------|
| None <input type="checkbox"/> | Rarely <input type="checkbox"/> | often <input type="checkbox"/> | Most often <input type="checkbox"/> |
|-------------------------------|---------------------------------|--------------------------------|-------------------------------------|

14. How long do you usually stay in the Parks, Rivers or green areas?

|                                 |                                      |                                      |                               |                                             |
|---------------------------------|--------------------------------------|--------------------------------------|-------------------------------|---------------------------------------------|
| 1 hour <input type="checkbox"/> | 1 - 2 hours <input type="checkbox"/> | 2 - 3 hours <input type="checkbox"/> | More <input type="checkbox"/> | I never visit them <input type="checkbox"/> |
|---------------------------------|--------------------------------------|--------------------------------------|-------------------------------|---------------------------------------------|

15. How would you describe the city of Gujrat in terms of greenery?

- a. A green city with urban and suburban green ☐
- b. A city without urban and very suburban green ☐
- c. A city without urban and suburban green ☐
- d. Other (you mentioned): \_\_\_\_\_ ☐

| 16. How important the following is for you |                                                                                                                              | 1                        | 2                        | 3                        | 4                        | 5                        |
|--------------------------------------------|------------------------------------------------------------------------------------------------------------------------------|--------------------------|--------------------------|--------------------------|--------------------------|--------------------------|
| A.                                         | The protection and preservation of the green to use them constantly                                                          | <input type="checkbox"/> |
| B.                                         | Improving and preserving greenery for future generations to use                                                              | <input type="checkbox"/> |
| C.                                         | Improving and maintaining the green even if you still do not use them                                                        | <input type="checkbox"/> |
| D.                                         | The possibilities offered by the green spaces for sports and leisure                                                         | <input type="checkbox"/> |
| E.                                         | The benefits we get from green spaces and improve our quality of life (oxygen, aesthetic value, corrosion protection, etc. ) | <input type="checkbox"/> |

---

17. Which side of the city is usually chosen when visiting the city?

- a. Parks ☐
- b. River ☐
- c. It depends on the temperature and the sunshine ☐
- d. I do not care much ☐
- E. Other::

18. Which part of the city do you think should be given importance in terms of urban green infrastructure (parks, sidewalks, leisure infrastructure, etc. )

- a. In the area of universities, airport, stadium etc . ☐
- b. In the area of River ☐
- c. In both areas ☐
- d. Other: \_\_\_\_\_ ☐

19. Suppose that a plan is proposed with all the necessary actions for the improvement and maintenance of the surrounding green of the city, by an independent - reliable body that will be established especially for this purpose. If the improvement and maintenance plan is approved, there will be a financial cost. In case of inability to finance the total cost of the project from the state or another source, would you be willing to contribute to the independent - reliable body with a one-time financial contribution?

YES ☐ NO ☐

20. If so, why?

- a. Because it is worth preserving the green for future generations ☐
- b. Because it is worth living with nature and greenery ☐
- c. Because we are upgrading the city aesthetically and touristically ☐
- d. Other: \_\_\_\_\_ ☐

21. If not, why not?

- a. I do not want to contribute due to low income ☐
- b. To be paid by the State or the Local Government ☐
- c. I do not want to contribute because I estimate my money will go to another purpose ☐
- d. Not interested... ☐
- e. Other: \_\_\_\_\_ ☐

22. Mention anything related to the urban and suburban green of Gujrat that you think is remarkable and we will find useful:
